# Supplementary material
Source: MDPI journal article supplement (https://www.mdpi.com/2071-1050/14/24/16339)

## Supplementary Material

**Table S1**

Classification and weighing of solid waste for the 6 collection and transportation routes in the municipality of Puerto Carreño.

| Classification             | Type of material     | Route E |         | Route F |         | Route B |         | Route A |         | Route C |         | Route D |         |
|----------------------------|----------------------|---------|---------|---------|---------|---------|---------|---------|---------|---------|---------|---------|---------|
|                            |                      | Kg      | %       |
| Recyclable organic waste   | Food waste           | 7,58    | 11,32 % | 5,1     | 7,74%   | 8,98    | 14,70 % | 4,15    | 6,74%   | 5,95    | 8,96%   | 3,08    | 4,56%   |
|                            | Organic waste        | 9,83    | 14,68 % | 15,25   | 23,14 % | 9,78    | 16,01 % | 16,84   | 27,36 % | 22,04   | 33,18 % | 19,4    | 28,71 % |
|                            | Plastics             | 13,79   | 20,60 % | 5,23    | 7,94%   | 7,64    | 12,51 % | 3,75    | 6,09%   | 6,87    | 10,34 % | 5,43    | 8,04%   |
|                            | Paper                | 1,03    | 1,54%   | 1,78    | 2,70%   | 1,69    | 2,77%   | 2,4     | 3,90%   | 2       | 3,01%   | 3,76    | 5,56%   |
| Recyclable inorganic waste | Cardboard            | 6,8     | 10,16 % | 2       | 3,03%   | 4,74    | 7,76%   | 5       | 8,12%   | 4,44    | 6,68%   | 8,3     | 12,28 % |
|                            | Glass                | 1,15    | 1,72%   | 2,99    | 4,54%   | 4,92    | 8,06%   | 0,57    | 0,93%   | 1,72    | 2,59%   | 0,73    | 1,08%   |
|                            | Metals               | 0,58    | 0,87%   | 0,65    | 0,99%   | 1,03    | 1,69%   | 0,64    | 1,04%   | 1,16    | 1,75%   | 1,55    | 2,29%   |
|                            | Textiles             | 0       | 0,00%   | 0       | 0,00%   | 0       | 0,00%   | 3,52    | 5,72%   | 0,81    | 1,22%   | 0       | 0,00%   |
| Non-recyclable waste       | Non-recyclable waste | 26,18   | 39,11 % | 32,9    | 49,92 % | 22,3    | 36,51 % | 24,69   | 40,11 % | 21,43   | 32,26 % | 25,32   | 37,47 % |
| Total sample weight        |                      | 66,94   | 100%    | 65,9    | 100%    | 61,08   | 100%    | 61,56   | 100%    | 66,42   | 100%    | 67,57   | 100%    |

**Table S2**

Summary of percentage waste composition (%) for the city of Puerto Carreño, by solid waste type, with the indication of the 95%-confidence intervals across the samples for the 6 routes.

| Classification             | Type of material     | Percentage distribution of Solid Waste generated (95% confidence interval) |
|----------------------------|----------------------|----------------------------------------------------------------------------|
| Recyclable organic waste   | Food waste           | 9% ± 3%                                                                    |
|                            | Organic waste        | 24% ± 5%                                                                   |
|                            | Plastics             | 11% ± 4%                                                                   |
|                            | Paper                | 3% ± 1%                                                                    |
| Recyclable inorganic waste | Cardboard            | 8% ± 2%                                                                    |
|                            | Glass                | 3% ± 2%                                                                    |
|                            | Metals               | 1% ± 0.4%                                                                  |
|                            | Textiles             | 1% ± 1%                                                                    |
| Non-recyclable waste       | Non-recyclable waste | 39% ± 4%                                                                   |

**Table S3**

Calculation of the capacity of the waste collection vehicle based on the percentage distribution of solid waste, the unit weight of each material and the total volume of the vehicle.

| Type of material     | Percentage distribution of solid waste generated (%) | Vehicle capacity distributed in the percentage of solid waste produced per material (10.7038 m <sup>3</sup> ) <sup>i</sup> | Unit weight (kg/m <sup>3</sup> ) <sup>ii</sup> | Weight of solid waste (kg) | Weight of solid waste (Ton) |
|----------------------|------------------------------------------------------|----------------------------------------------------------------------------------------------------------------------------|------------------------------------------------|----------------------------|-----------------------------|
| Food waste           | 9%                                                   | 0,9575                                                                                                                     | 481                                            | 460,56                     | 0,461                       |
| Organic waste        | 24%                                                  | 2,5598                                                                                                                     | 700                                            | 1791,84                    | 1,792                       |
| Plastics             | 11%                                                  | 1,1738                                                                                                                     | 131                                            | 153,77                     | 0,154                       |
| Paper                | 3%                                                   | 0,3479                                                                                                                     | 131                                            | 45,58                      | 0,046                       |
| Cardboard            | 8%                                                   | 0,8597                                                                                                                     | 80                                             | 68,77                      | 0,069                       |
| Glass                | 3%                                                   | 0,3320                                                                                                                     | 481                                            | 159,69                     | 0,160                       |
| Metals               | 1%                                                   | 0,1542                                                                                                                     | 240                                            | 37,00                      | 0,037                       |
| Textiles             | 1%                                                   | 0,1190                                                                                                                     | 101                                            | 12,02                      | 0,012                       |
| Non-recyclable waste | 39%                                                  | 4,2000                                                                                                                     | 451                                            | 1894,18                    | 1,894                       |
| <b>Total</b>         | 100%                                                 | 10,7038                                                                                                                    | N/A                                            | 4623,41                    | 4,623                       |

<sup>i</sup> The vehicle is a waste compactor truck maximizing the amount of waste per volume unit.

<sup>ii</sup> Source: (MVCT, 2012)

**Table S4**

The annual estimate of the solid waste produced and potentially recyclable based on the population of the municipality of Puerto Carreño based on our characterization projected from 2020 to 2035 (projections of population by DANE, (DANE, 2018)).

| Year | Number of inhabitants | Projection of Waste Generated (ton/year) | Potentially recyclable waste (ton/year) |
|------|-----------------------|------------------------------------------|-----------------------------------------|
| 2020 | 15.697                | 2891,4                                   | 1763,7                                  |
| 2021 | 15.911                | 2930,8                                   | 1787,8                                  |
| 2022 | 16.069                | 2959,9                                   | 1805,5                                  |
| 2023 | 16.216                | 2987,0                                   | 1822,1                                  |
| 2024 | 16.224                | 2988,5                                   | 1823,0                                  |
| 2025 | 16.222                | 2988,1                                   | 1822,7                                  |
| 2026 | 16.222                | 2988,1                                   | 1822,7                                  |
| 2027 | 16.252                | 2993,6                                   | 1826,1                                  |
| 2028 | 16.281                | 2999,0                                   | 1829,4                                  |
| 2029 | 16.317                | 3005,6                                   | 1833,4                                  |
| 2030 | 16.364                | 3014,2                                   | 1838,7                                  |
| 2031 | 16.416                | 3023,8                                   | 1844,5                                  |
| 2032 | 16.441                | 3028,4                                   | 1847,3                                  |
| 2033 | 16.482                | 3036,0                                   | 1852,0                                  |

|             |        |            |         |
|-------------|--------|------------|---------|
| 2034        | 16.511 | 3041,3     | 1855,2  |
| 2035        | 16.528 | 3044,5     | 1857,1  |
| Total waste |        | 47920,1826 | 29231,3 |

**Figure S1** – Calculation of the lifetime gain of El Merrey sanitary landfill due to the removal of the recycling waste fraction. On the left, from left to right, the Table shows Years, population (# inhabitants), total annual waste production, annual recyclable waste production, accumulated total waste production and accumulated recyclable waste production. In a business-as-usual scenario, the accumulated total waste production column shows that in 2042, end of the legal lifetime of the sanitary landfill, 157 389 tons are produced. This amount of waste is reached by 2071 in a plausible scenario where i) no recycling is performed from 2013 to 2022, and ii) a 100% recycling policy is performed where 61% of the waste is not eventually going to El Merrey.

Population trends available from 2020 to 2035 (Supplementary Table 4; DANE, 2018) were linearly extrapolated to the periods 2013-2019 and 2035-2072 (equation in orange, graphic on the right). Total waste production was estimated multiplying the yearly population with the per capita waste production (equation in blue; assuming here a per capita waste production of 0.884 kg/capita/day; note that the same results are obtained with the estimate of our study: 0.504 kg/capita/day). Recycling waste production is assumed to be ~61% of the total waste production which corresponds to the percentage calculated in our characterization (equation in grey).

| Years | Population | TOTAL WASTE                    | RECYCLABLE WASTE               | Accumulated TOTAL WASTE        | Accumulated TOTAL - RECYCLABLE |
|-------|------------|--------------------------------|--------------------------------|--------------------------------|--------------------------------|
|       | (# hab.)   | Yearly waste production (tons) |
| 2013  | 15637      | 5045                           | 3078                           | 5045                           | 5045                           |
| 2014  | 15680      | 5059                           | 3086                           | 10105                          | 10105                          |
| 2015  | 15723      | 5073                           | 3095                           | 15178                          | 15178                          |
| 2016  | 15766      | 5087                           | 3103                           | 20265                          | 20265                          |
| 2017  | 15809      | 5101                           | 3112                           | 25366                          | 25366                          |
| 2018  | 15852      | 5115                           | 3120                           | 30480                          | 30480                          |
| 2019  | 15895      | 5129                           | 3128                           | 35609                          | 35609                          |
| 2020  | 15697      | 5065                           | 3090                           | 40674                          | 40674                          |
| 2021  | 15911      | 5134                           | 3132                           | 45807                          | 45807                          |
| 2022  | 16069      | 5185                           | 3163                           | 50992                          | 50992                          |
| 2023  | 16216      | 5232                           | 3192                           | 56224                          | 53033                          |
| 2024  | 16224      | 5235                           | 3193                           | 61459                          | 55074                          |
| 2025  | 16222      | 5234                           | 3193                           | 66694                          | 57116                          |
| 2026  | 16222      | 5234                           | 3193                           | 71928                          | 59157                          |
| 2027  | 16252      | 5244                           | 3199                           | 77172                          | 61202                          |
| 2028  | 16281      | 5253                           | 3204                           | 82425                          | 63251                          |
| 2029  | 16317      | 5265                           | 3212                           | 87690                          | 65304                          |
| 2030  | 16364      | 5280                           | 3221                           | 92970                          | 67363                          |
| 2031  | 16416      | 5297                           | 3231                           | 98266                          | 69429                          |
| 2032  | 16441      | 5305                           | 3236                           | 103571                         | 71498                          |
| 2033  | 16482      | 5318                           | 3244                           | 108889                         | 73572                          |
| 2034  | 16511      | 5327                           | 3250                           | 114217                         | 75650                          |
| 2035  | 16528      | 5333                           | 3253                           | 119550                         | 77730                          |
| 2036  | 16625      | 5364                           | 3272                           | 124914                         | 79822                          |
| 2037  | 16668      | 5378                           | 3281                           | 130292                         | 81919                          |
| 2038  | 16710      | 5392                           | 3289                           | 135684                         | 84022                          |
| 2039  | 16753      | 5406                           | 3297                           | 141089                         | 86130                          |
| 2040  | 16796      | 5420                           | 3306                           | 146509                         | 88244                          |
| 2041  | 16839      | 5433                           | 3314                           | 151942                         | 90363                          |
| 2042  | 16882      | 5447                           | 3323                           | 157389                         | 92487                          |
| 2043  | 16925      | 5461                           | 3331                           |                                | 94617                          |
| 2044  | 16968      | 5475                           | 3340                           |                                | 96752                          |
| 2045  | 17011      | 5489                           | 3348                           |                                | 98893                          |
| 2046  | 17054      | 5503                           | 3357                           |                                | 101039                         |
| 2047  | 17097      | 5516                           | 3365                           |                                | 103190                         |
| 2048  | 17140      | 5530                           | 3374                           |                                | 105347                         |
| 2049  | 17183      | 5544                           | 3382                           |                                | 107509                         |
| 2050  | 17226      | 5558                           | 3390                           |                                | 109677                         |
| 2051  | 17269      | 5572                           | 3399                           |                                | 111850                         |
| 2052  | 17312      | 5586                           | 3407                           |                                | 114028                         |
| 2053  | 17355      | 5600                           | 3416                           |                                | 116212                         |
| 2054  | 17398      | 5613                           | 3424                           |                                | 118402                         |
| 2055  | 17440      | 5627                           | 3433                           |                                | 120596                         |
| 2056  | 17483      | 5641                           | 3441                           |                                | 122796                         |
| 2057  | 17526      | 5655                           | 3450                           |                                | 125002                         |
| 2058  | 17569      | 5669                           | 3458                           |                                | 127213                         |
| 2059  | 17612      | 5683                           | 3466                           |                                | 129429                         |
| 2060  | 17655      | 5697                           | 3475                           |                                | 131651                         |
| 2061  | 17698      | 5710                           | 3483                           |                                | 133878                         |
| 2062  | 17741      | 5724                           | 3492                           |                                | 136110                         |
| 2063  | 17784      | 5738                           | 3500                           |                                | 138348                         |
| 2064  | 17827      | 5752                           | 3509                           |                                | 140591                         |
| 2065  | 17870      | 5766                           | 3517                           |                                | 142840                         |
| 2066  | 17913      | 5780                           | 3526                           |                                | 145094                         |
| 2067  | 17956      | 5794                           | 3534                           |                                | 147354                         |
| 2068  | 17999      | 5807                           | 3543                           |                                | 149619                         |
| 2069  | 18042      | 5821                           | 3551                           |                                | 151889                         |
| 2070  | 18085      | 5835                           | 3559                           |                                | 154165                         |
| 2071  | 18128      | 5849                           | 3568                           |                                | 156446                         |
| 2072  | 18171      | 5863                           | 3576                           |                                | 158732                         |

No recycling during 2013-2022  
Everything is recycled and no recyclable waste goes to El Meray

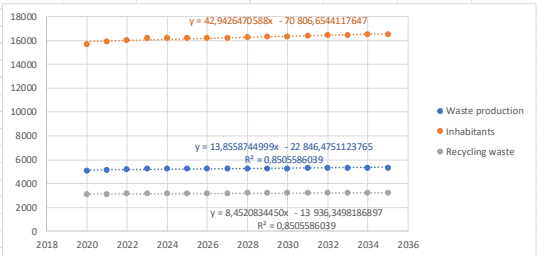

**Figure S2**

Comparison of percentage (%) of solid waste distribution (only for recyclable material) between 4 main cities of Colombia (according to municipal reports found in CONPES, 2016) and our estimate in Puerto Carreño (Vichada-Colombia, black bar).

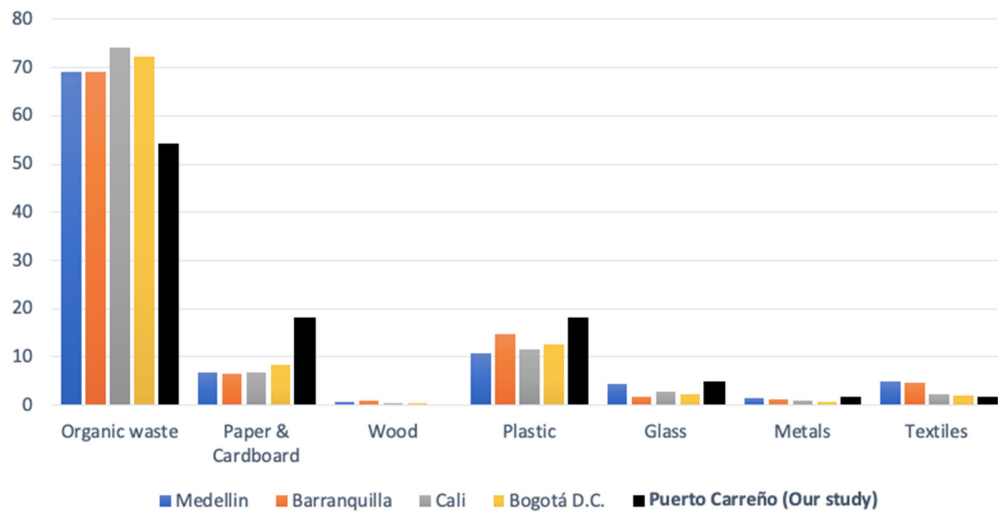

Supplement: s1 [file s1]
